# Supplementary material
Source: PubMed Central journal article supplement (PMC4129020)
Supplement: ijcep0007-4067-f4.pdf [file ijcep0007-4067-f4.pdf]

# Dynamic metabolites profile of cerebral ischemia/reperfusion

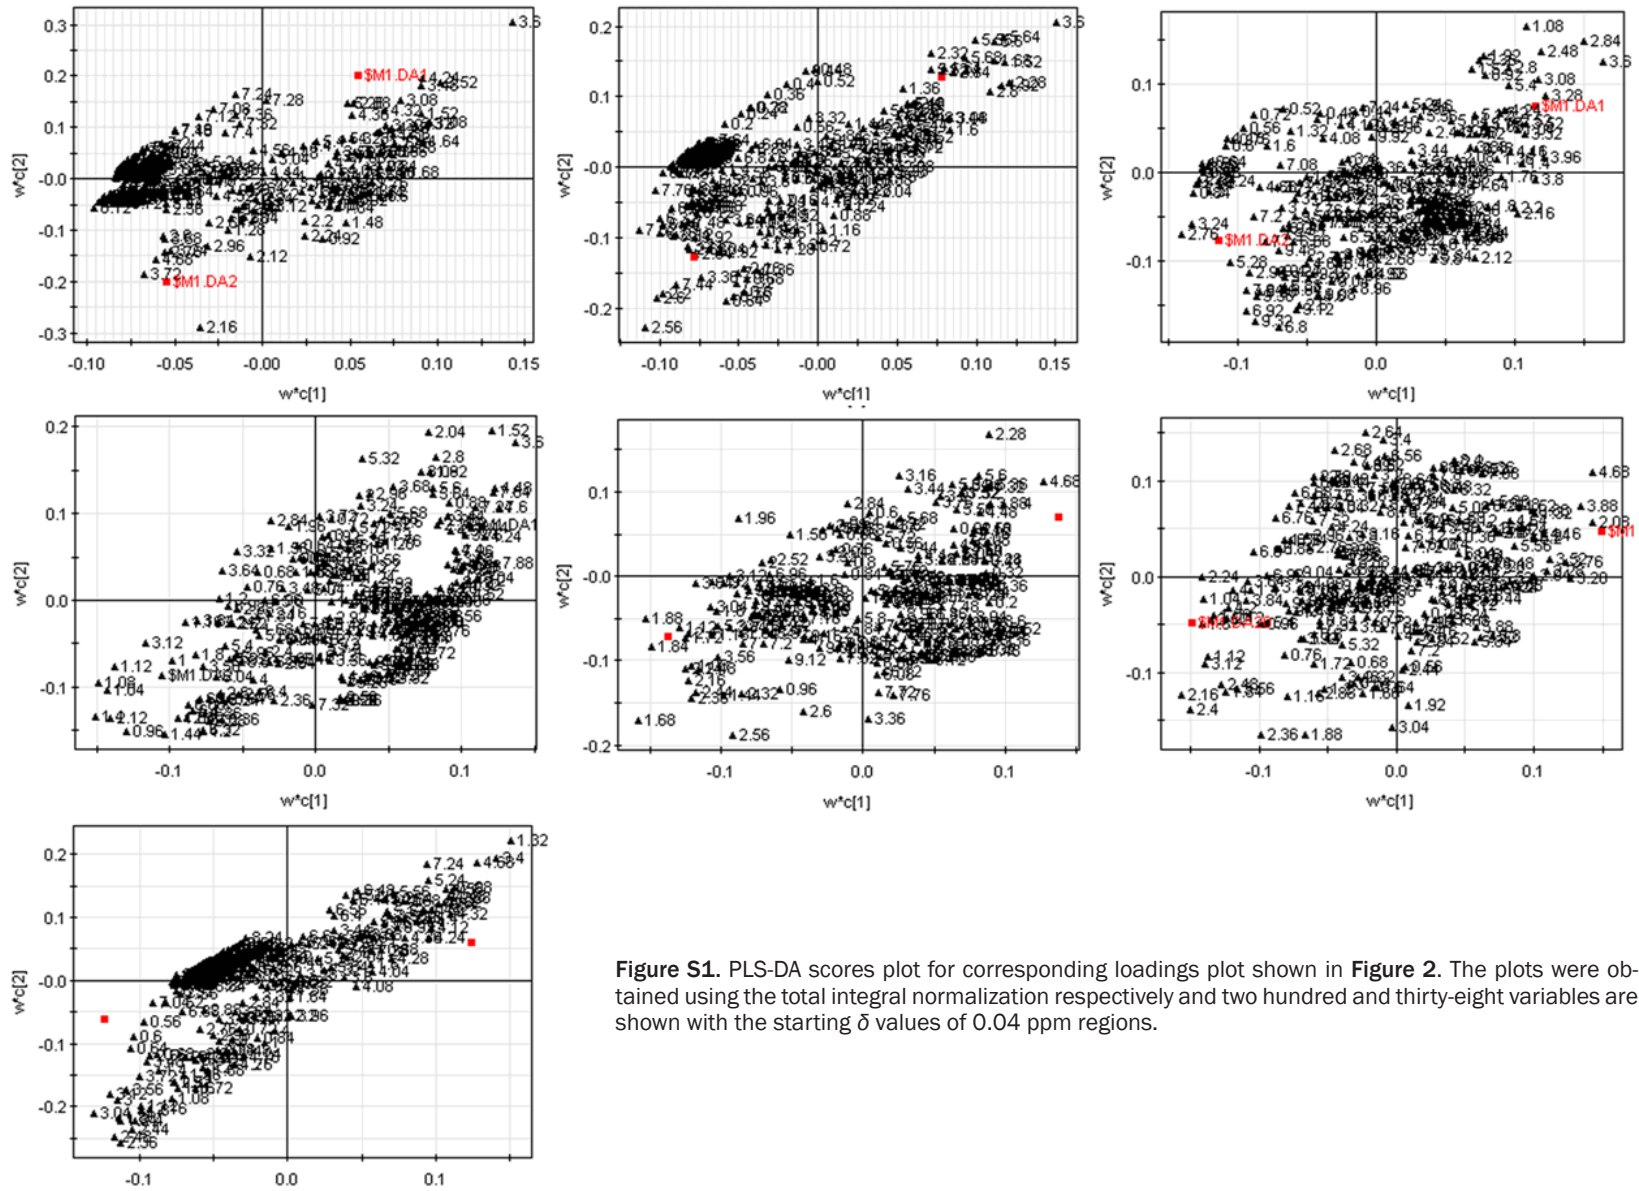

Figure S1. PLS-DA scores plot for corresponding loadings plot shown in Figure 2. The plots were obtained using the total integral normalization respectively and two hundred and thirty-eight variables are shown with the starting  $\delta$  values of 0.04 ppm regions.
